# Supplementary material for: Recent Progress in Discovering the Role of Carotenoids and Metabolites in Prostatic Physiology and Pathology—A Review—Part II: Carotenoids in the Human Studies
Source: MDPI journal article supplement (doi:10.3390/antiox10020319), 2021-02-20
Supplement: s1 [file s1]

Review

# Recent Progress in Discovering the Role of Carotenoids and Metabolites in Prostatic Physiology and Pathology—A Review—Part II: Carotenoids in the Human Studies.

Joanna Dulińska-Litewka <sup>1,\*</sup>, Przemysław Hałubiec <sup>1</sup>, Agnieszka Łazarczyk <sup>1</sup>, Oskar Szafrński <sup>1</sup>, Yoav Sharoni <sup>2</sup>, James A. McCubrey <sup>3</sup>, Bartosz Gąsiorkiewicz <sup>1</sup>, Torsten Bohn <sup>4</sup>

<sup>1</sup> Chair of Medical Biochemistry Medical College, Jagiellonian University, 31-034 Cracow, Poland; przemyslawhalubiec@gmail.com (P.H.), agnieszka.lazarczyk@student.uj.edu.pl (A.Ł.), osk.sza2@gmail.com (O.S.), b.gasiorkiewicz@student.uj.edu.pl (B.G.).

<sup>2</sup> Department of Clinical Biochemistry, Faculty of Health Sciences, Ben-Gurion University of the Negev, P.O. Box 653, Beer Sheva, Israel; yoav@bgu.ac.il

<sup>3</sup> Department of Microbiology and Immunology, Brody Medical Sciences Building, East Carolina University, Greenville, NC 27834, USA; mccubreyj@ecu.edu

<sup>4</sup> Luxembourg Institute of Health, Population Health Department, Nutrition and Health Research Group 1 A-B, rue Thomas Edison, L-23 1445 Strassen, Luxembourg; Torsten.bohn@gmx.ch

\* Correspondence: joanna.dulinska-litewka@uj.edu.pl; Tel.: +48-12-422-32-72

## Supplementary

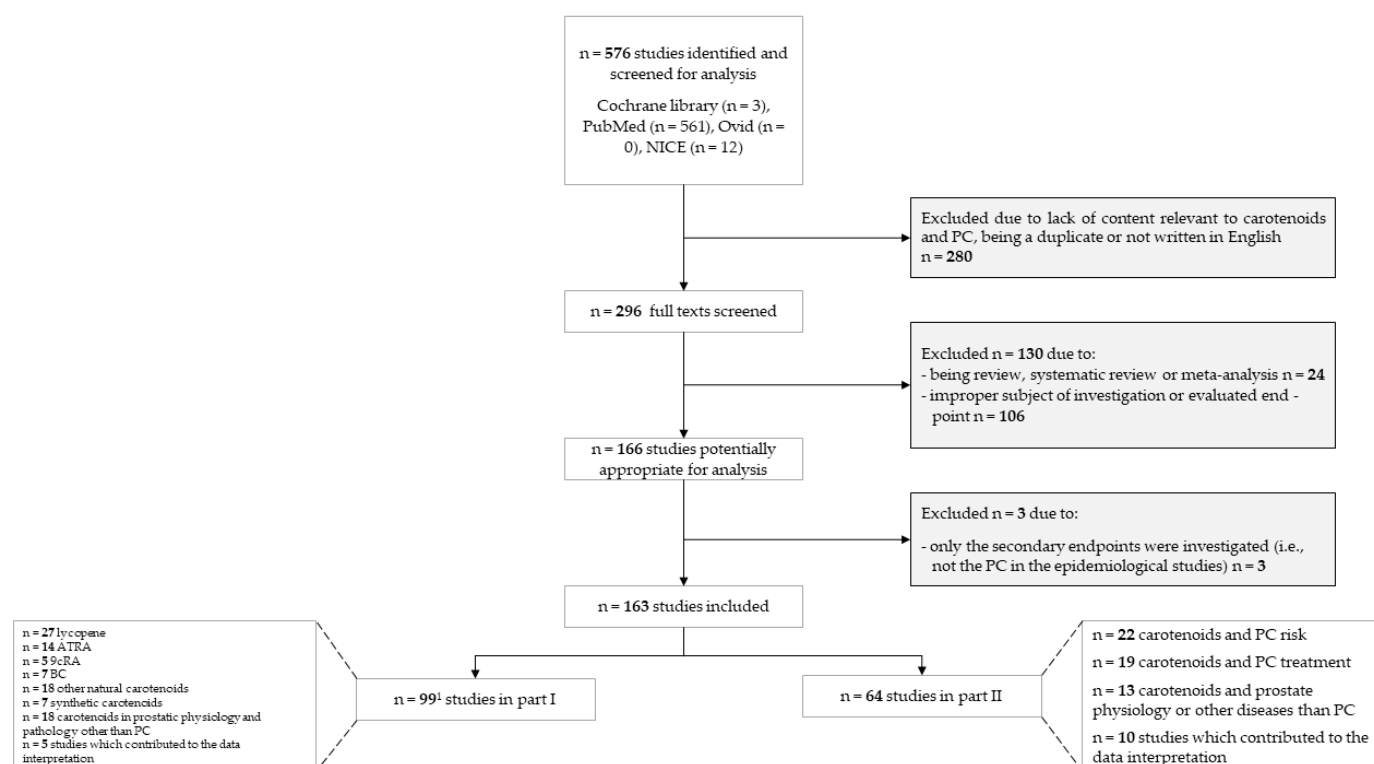

Figure 1. The flow chart summarizing the process of data extraction.
